# Supplementary material
Source: PubMed Central journal article supplement (PMC7266657)
Supplement: NIHMS1568265-supplement-1.pdf [file NIHMS1568265-supplement-1.pdf]

**Fig. S1.**

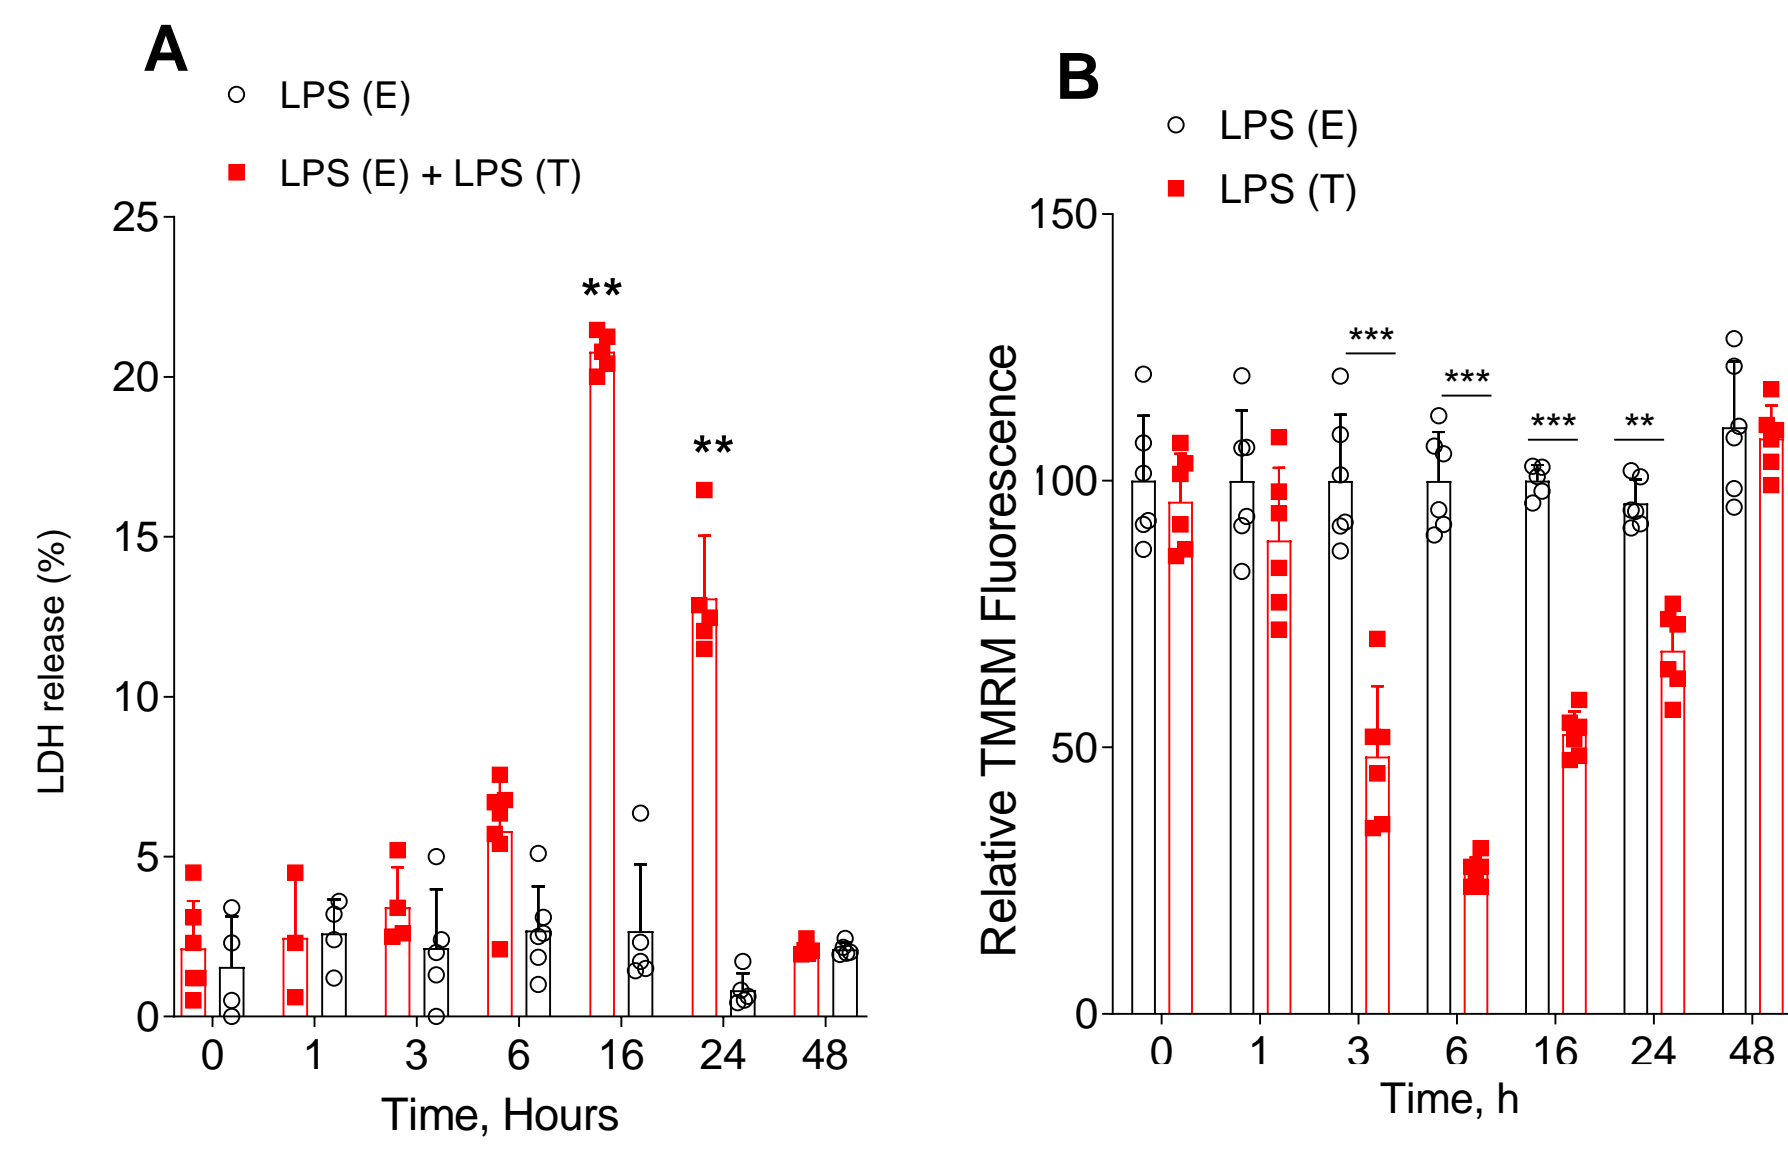

**Fig. S1. related to Figure 1. Time course of intracellular LPS-induced endothelial pyroptotic cell death and decreased mitochondrial membrane potential.** (A) hLMVECs were primed with extracellular LPS (LPS (E), 1  $\mu\text{g}/\text{ml}$ , 3h), followed by medium change (0.01% FBS) and transfection with LPS (LPS (T), 0.5  $\mu\text{g}/\text{ml}$ , 0-48 h) to increase intracellular LPS levels. The LDH levels in the medium were analyzed by an LDH assay kit,  $n = 4-6$ . (B) hLMVECs were primed with LPS (LPS (E), 1  $\mu\text{g}/\text{ml}$ , 3h), followed by medium change and transfection with LPS (LPS (T), 0.5  $\mu\text{g}/\text{ml}$ , 0-48 h). The mitochondrial membrane potential (MMP) in hLMVECs was analyzed by staining with the potentiometric mitochondrial dye TMRM,  $n = 5-6$ . \* \*  $P < 0.01$ , \* \* \*  $P < 0.001$ , two-tailed  $t$ -test. Values are mean  $\pm$  SD. Data were obtained from three independent experiments.

**Fig. S2.**

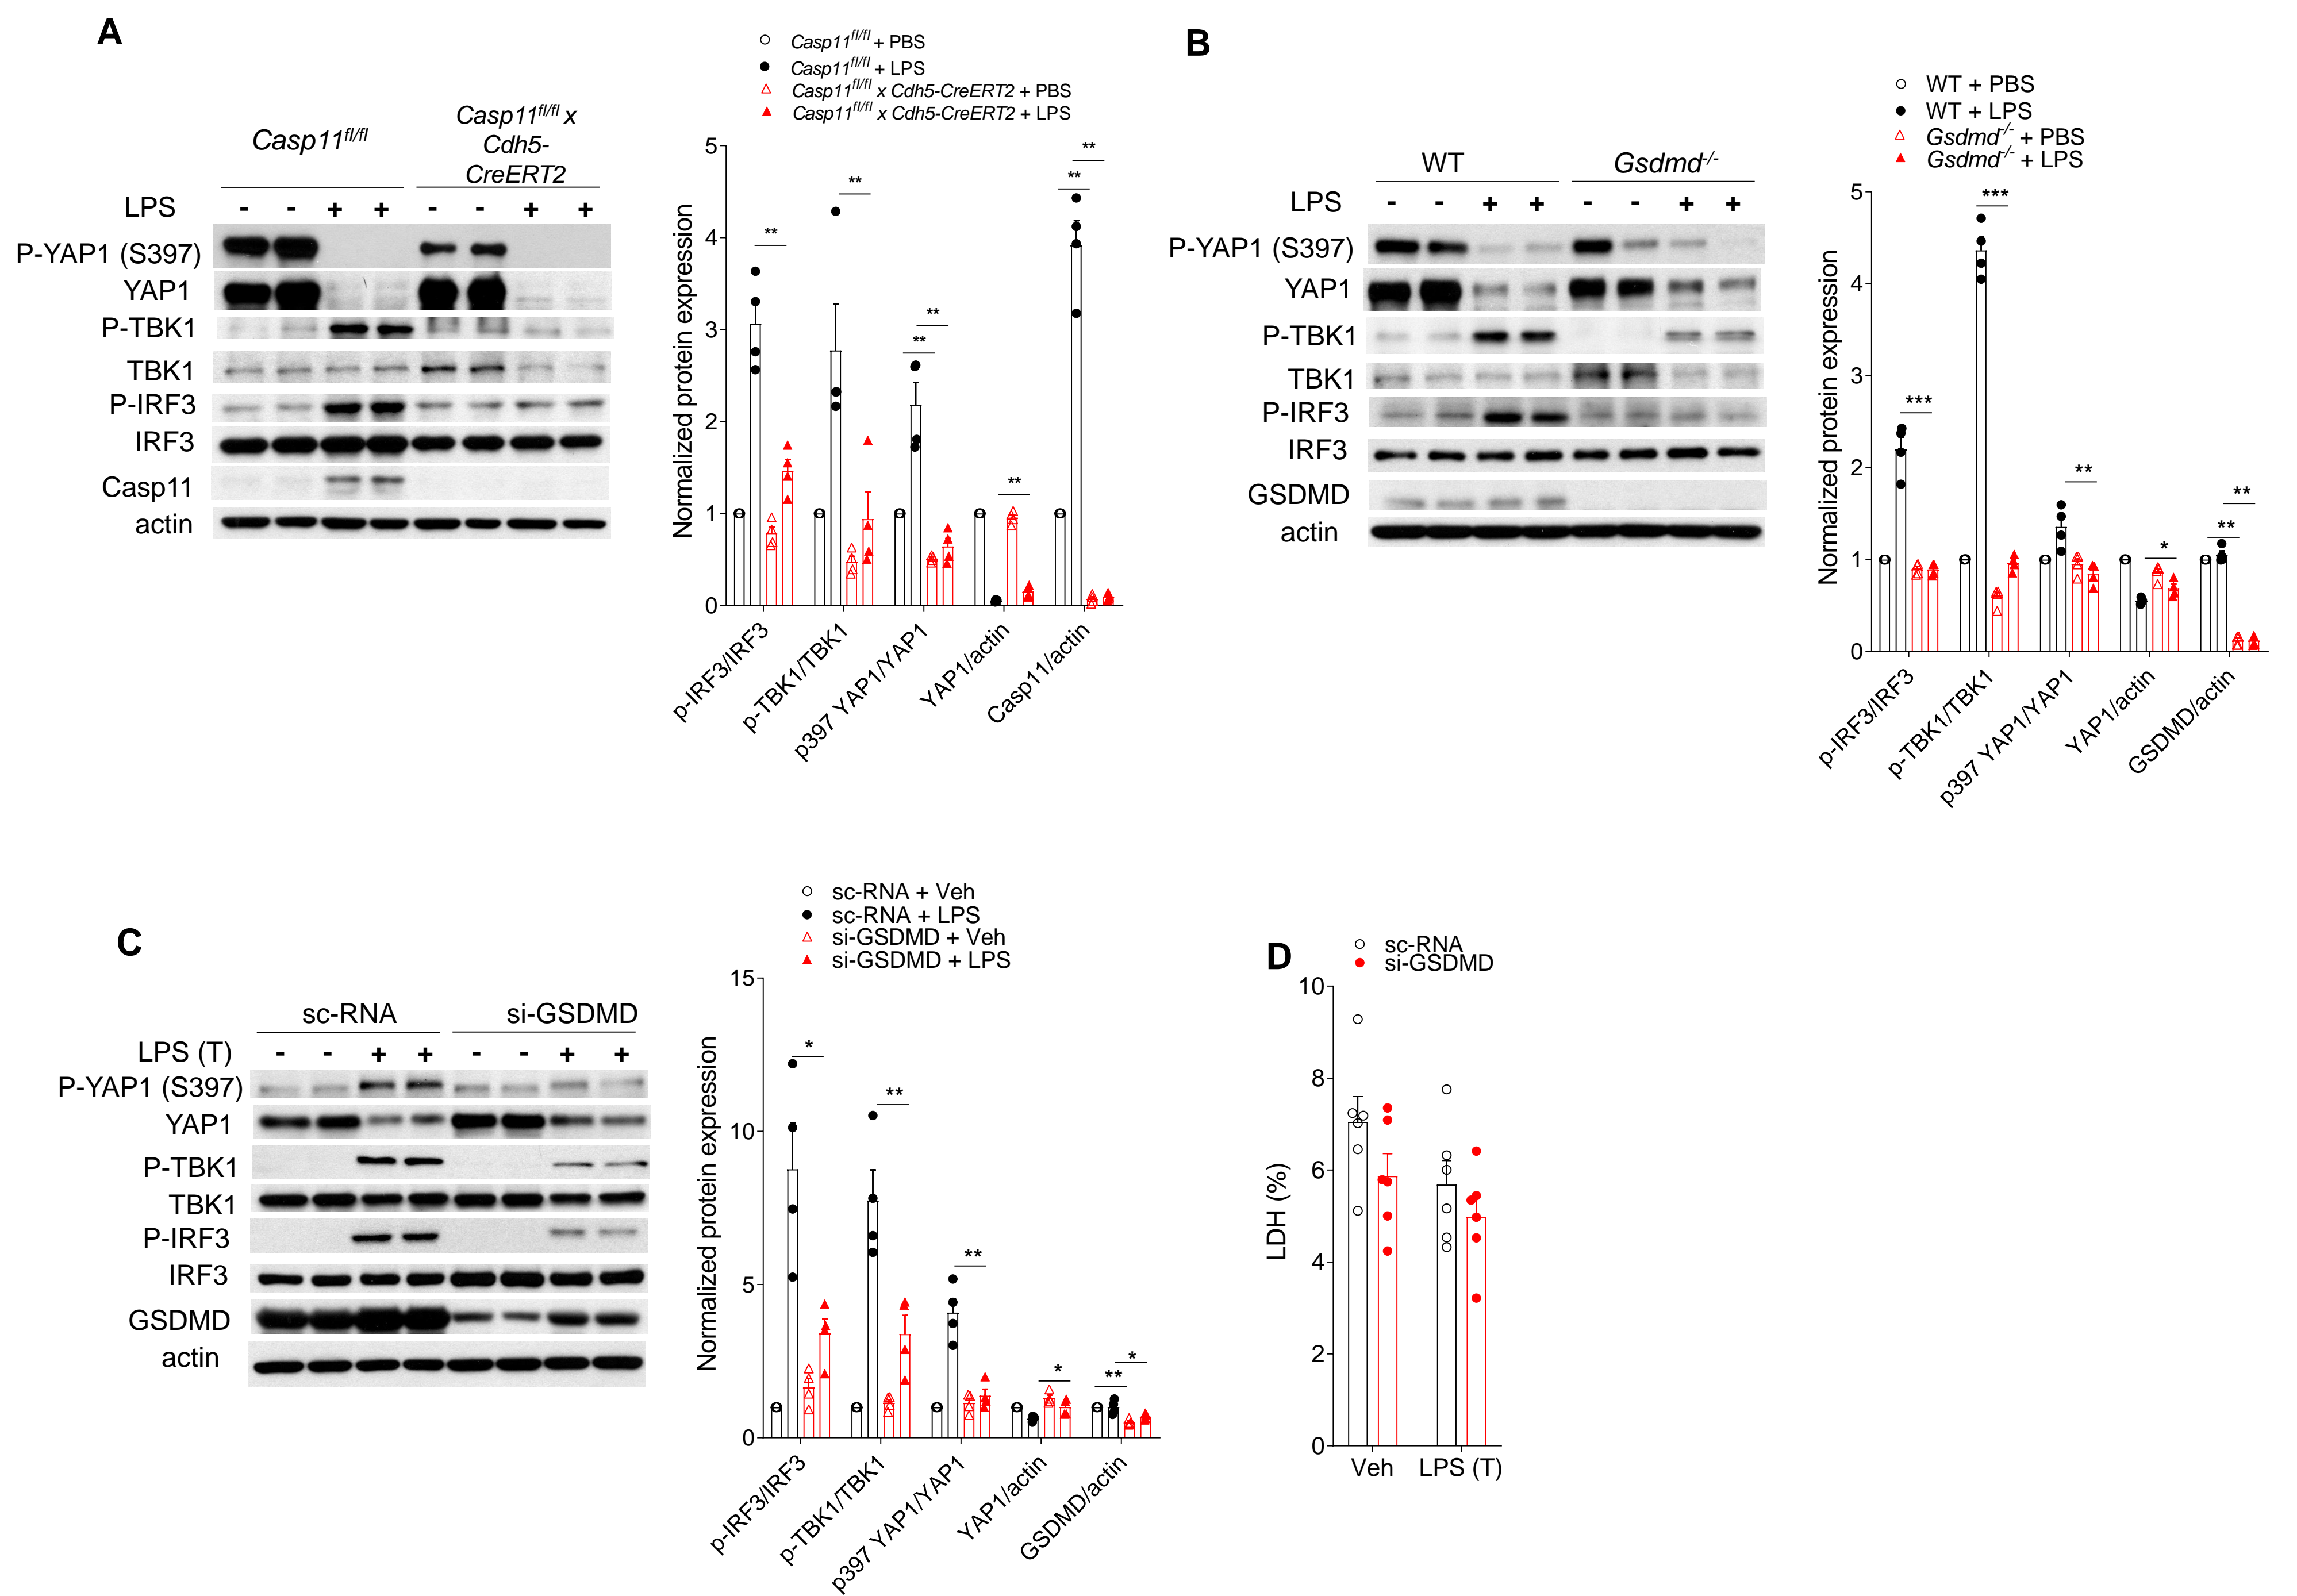

**Fig. S2. related to Figure 3 and 5. LPS induced cGAS-YAP1 signaling is dependent on Casp11-GSDMD pathway.** (A) Primary mouse lung endothelial cells were isolated from *Casp11<sup>fl/fl</sup>* and *Casp11<sup>ECKO</sup>* mouse post-LPS (10 mg/kg, *i.p.*, 6 h) challenge. The expression of proteins was analyzed by immunoblotting, quantified and normalized against actin,  $n = 4$ . (B) Primary mouse lung endothelial cells were isolated from WT and *GSDMD<sup>-/-</sup>* mouse post-LPS (10 mg/kg, *i.p.*, 6 h) challenge. The expression of proteins was analyzed by immunoblotting, quantified and normalized against actin,  $n = 4$ . (C) hLMVECs were transfected with 300 nM of negative control si-RNA (sc-RNA) and si-RNA target to human GSDMD (si-GSDMD) for 48 h. Then, cells were primed with LPS (LPS (E), 0.2  $\mu\text{g/ml}$ , 3h), followed with transfection with/without LPS (T) (0.5  $\mu\text{g/ml}$ ; 6h) treatment. The expression of proteins was analyzed by immunoblotting, quantified and normalized against actin,  $n = 4$ . (D) LDH level from hLMVECs with siRNA and LPS (T) treatment was assayed by using LDH assay kit,  $n = 6$ . \*  $P < 0.05$ , \*\*  $P < 0.01$ , \*\*\*  $P < 0.001$ , two-tailed  $t$ -test. Values are mean  $\pm$  SD. Data were obtained from three independent experiments.

**Fig. S3.**

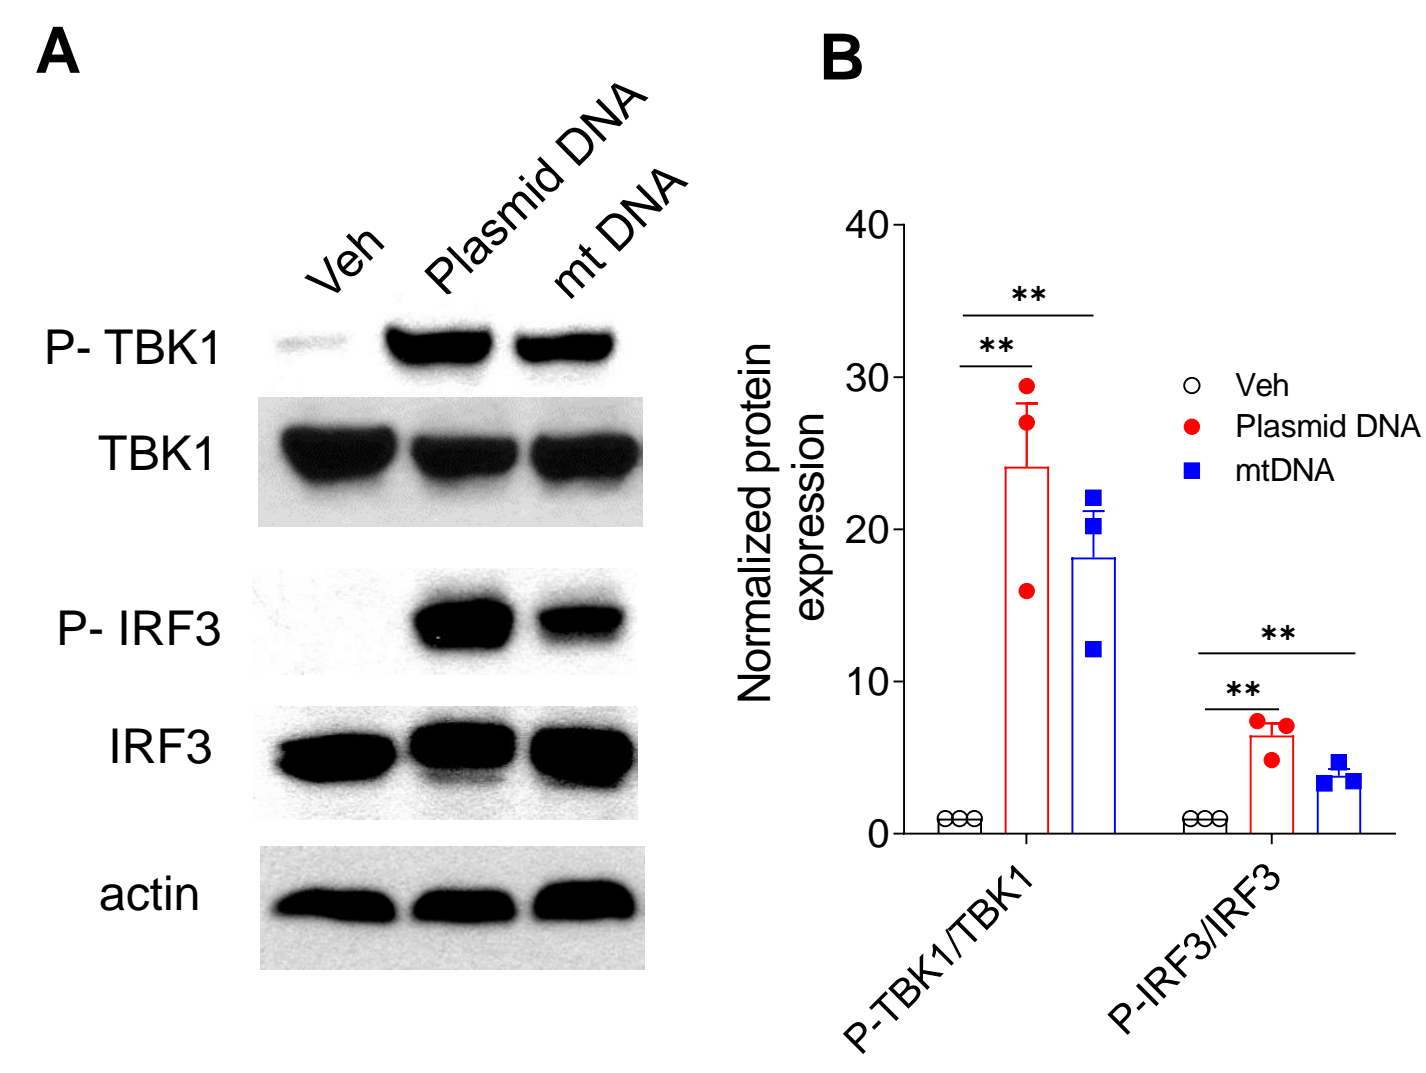

**Fig. S3. related to Figure 3. Plasmid DNA and mtDNA induce activation of cGAS signaling in human endothelial cells (hLMVECs).** (A) hLMVECs were transfected with plasmid DNA or mtDNA (3  $\mu$ g/ml). 6 h post transfection, the expression of proteins in hLMVECs was analyzed by immunoblotting. (B) Quantification of protein expression at 6 h post transfection of plasmid DNA or mtDNA. Values are mean  $\pm$  SD. Data were obtained from three independent experiments. \* \*  $P < 0.01$ , two-tailed  $t$ -test.



**Fig. S4.**

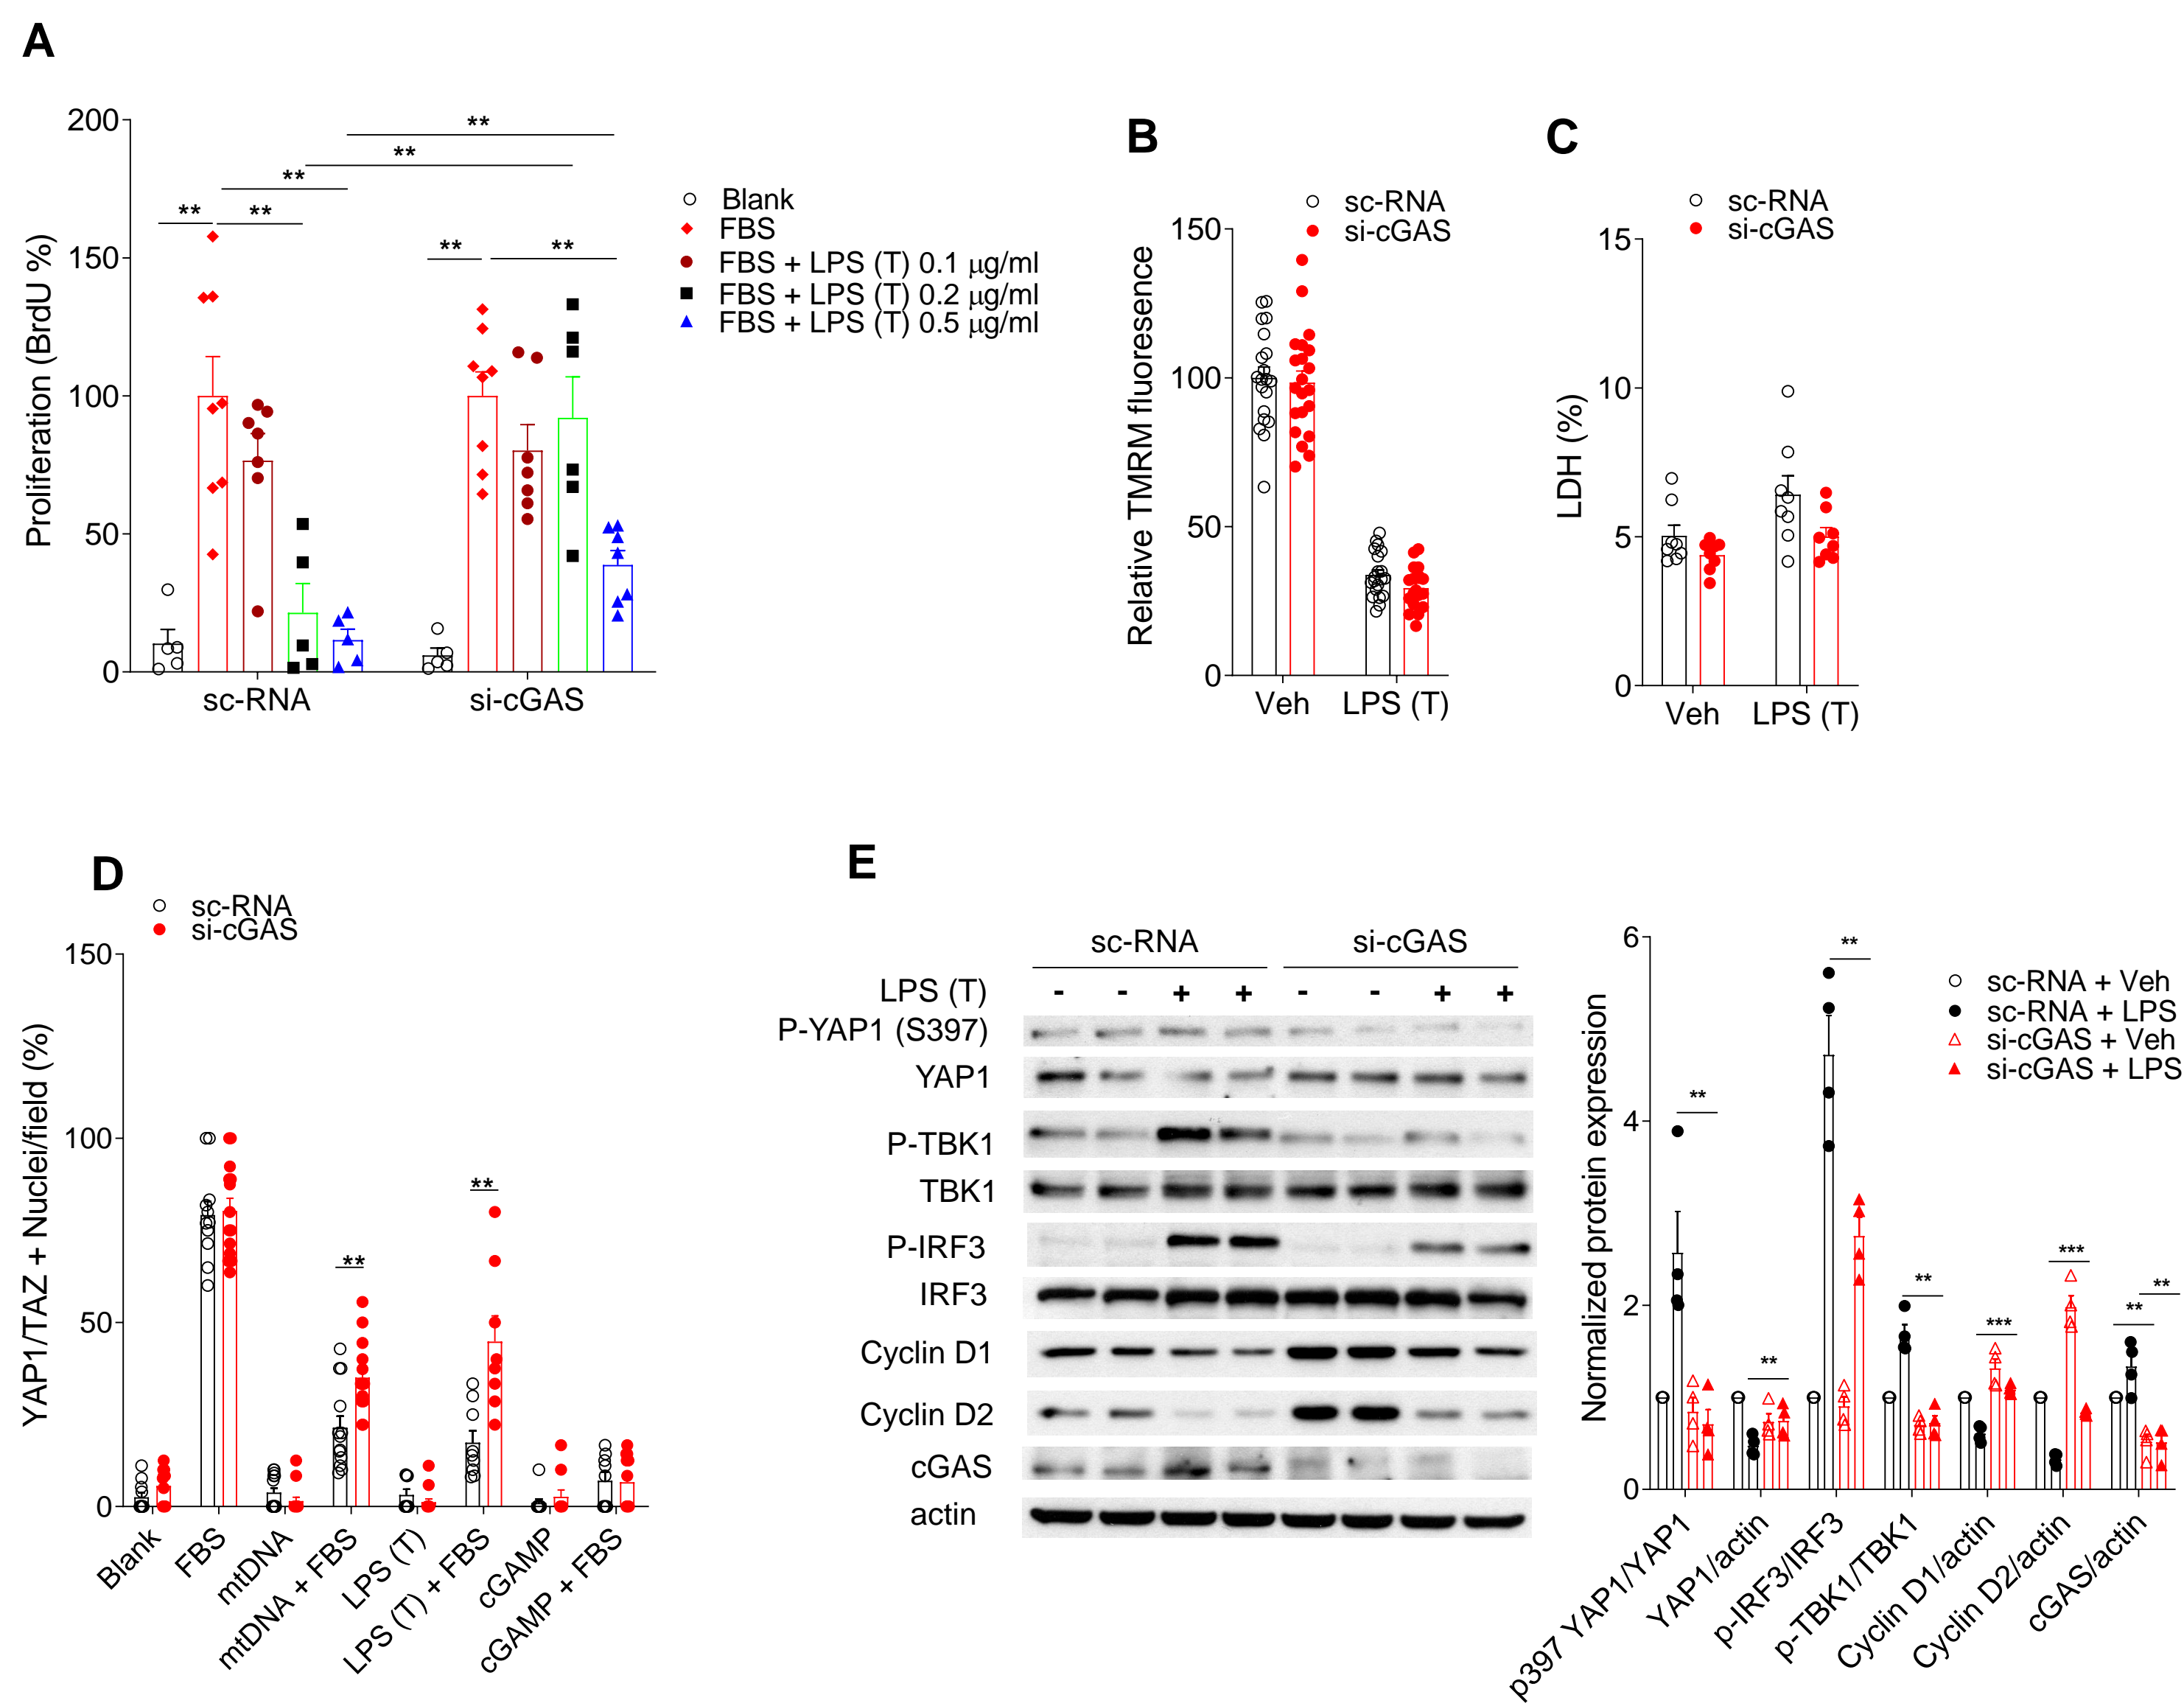

**Fig. S4. related to Figure 4 & 5. Intracellular LPS regulates cell proliferation via cGAS-YAP1 pathway.** hLMVECs were transfected with 300 nM of negative control si-RNA (sc-RNA) and si-RNA target to human cGAS (si-cGAS) for 48 h. (A) siRNA transfected cells were primed with LPS (LPS (E), 0.2  $\mu\text{g/ml}$ , 3h), followed with LPS (T) (0, 0.1, 0.2, 0.5  $\mu\text{g/ml}$ ) with/without 10%FBS for 6 h. And the cell proliferation was analyzed by using the proliferation assay kit,  $n = 5-8$ . (B) Mitochondrial membrane potential (MMP) in siRNA transfected hLMVECs with LPS (T) (0, 0.5  $\mu\text{g/ml}$ , 6 h) was analyzed by TMRM staining. Values are shown as mean  $\pm$  SD; data were obtained from three independent experiments,  $n = 18-21$ . (C) The LDH levels in the medium of siRNA transfected hLMVECs exposed to LPS (T) (0, 0.5  $\mu\text{g/ml}$ , 6 h) were analyzed using LDH assay kit. Values are shown as mean  $\pm$  SD; data were obtained from three independent experiments,  $n = 8$ . (D) siRNA transfected cells were transfected with mtDNA or cGAMP (0, 3  $\mu\text{g/ml}$ ; 20h) or LPS (T) (0, 0.5  $\mu\text{g/ml}$ , 6h), and followed with treatment of FBS treatments (10%, 1h). The nuclear translocation of YAP1/TAZ complex was analyzed by immunofluorescence staining. Values are shown as mean  $\pm$  SD; data were obtained from three independent experiments,  $n = 8-15$ . (E) siRNA transfected cells were treated with LPS (T) (0, 0.5  $\mu\text{g/ml}$ , 6h). The expression of proteins was analyzed by immunoblotting, quantified and normalized against actin. Values are mean  $\pm$  SD obtained from four independent experiments, two-tailed  $t$ -test. \*\*  $P < 0.01$ , \*\*\*  $P < 0.001$ .

**Fig. S5**

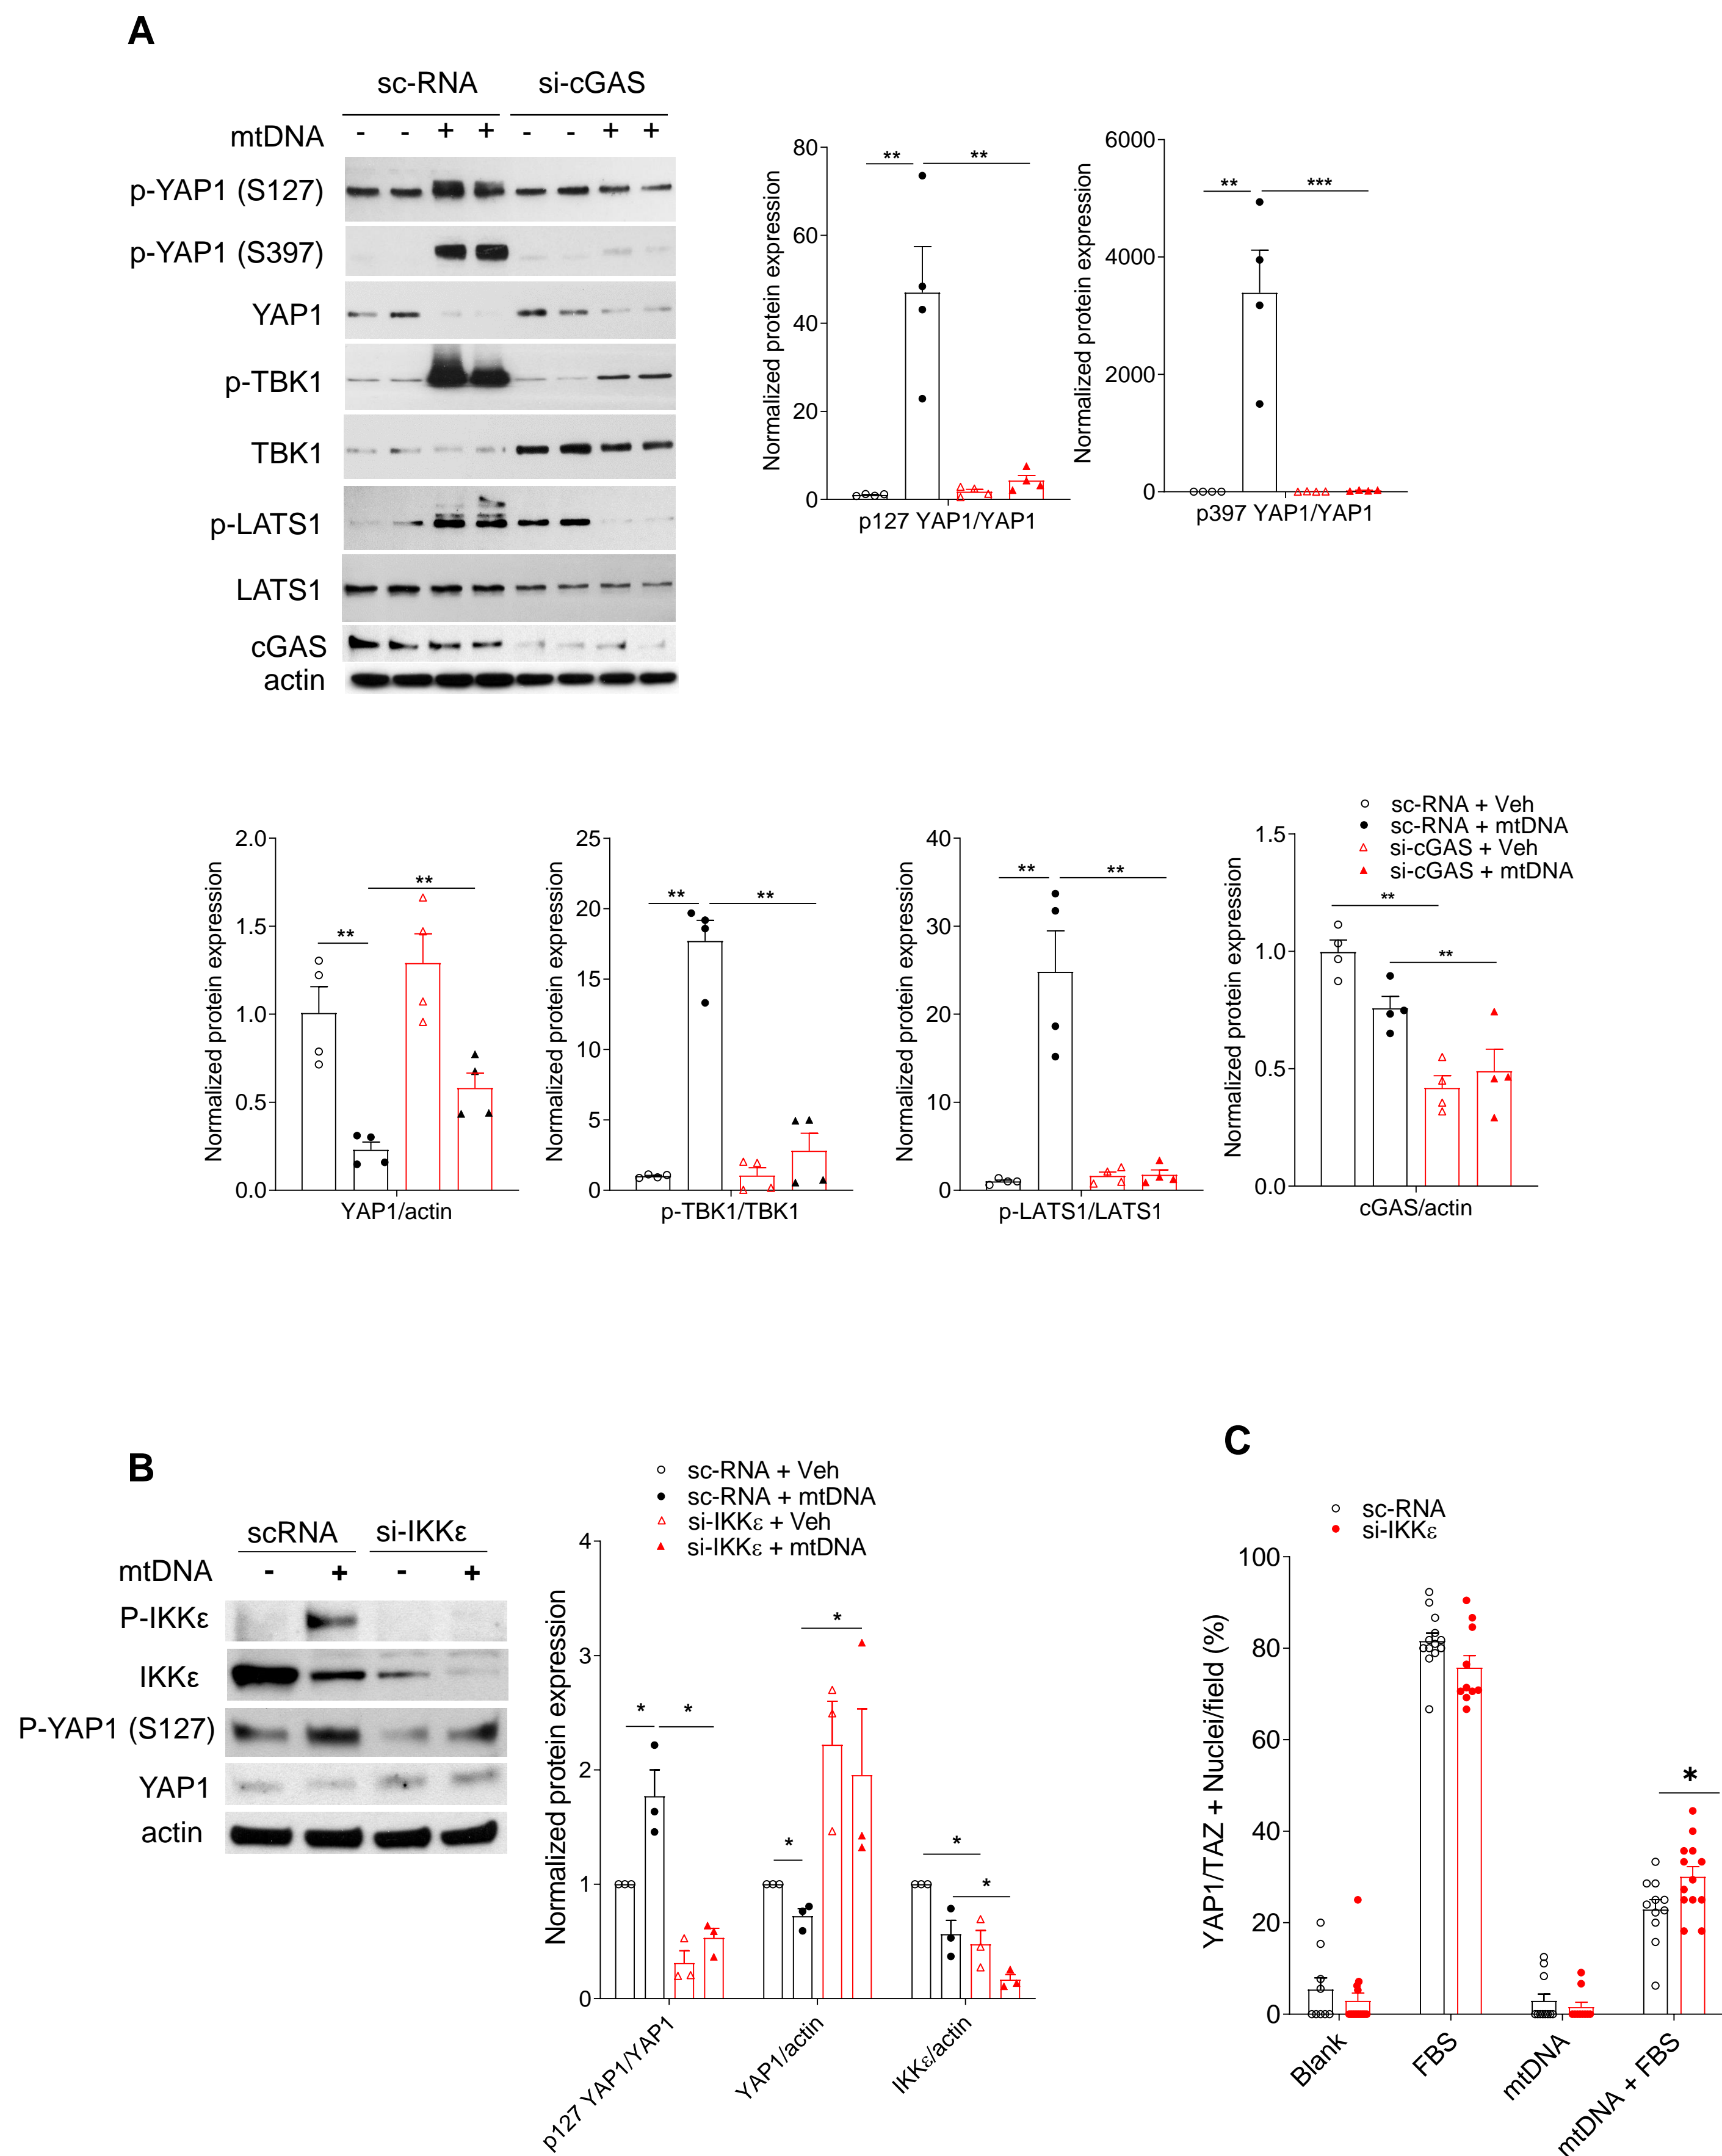

**Fig. S5. related to Figure 5. (A) cGAS regulates mtDNA inhibited YAP1 signaling.** hLMVECs were transfected with 300 nM of negative control si-RNA (sc-RNA) and si-RNA targeting human cGAS (si-cGAS) for 48 h. Cells were then transfected with mtDNA (0, 3  $\mu$ g/ml; 6h). The expression of proteins was analyzed by immunoblotting, quantified and normalized against actin. Data were obtained from four independent experiments. \*\*  $P < 0.01$ , two-tailed  $t$ -test. Values are mean  $\pm$  SD. **(B, C) Intracellular mtDNA regulates cell proliferation partly through IKK $\epsilon$  pathway.** hLMVECs were transfected with 300 nM of negative control si-RNA (sc-RNA) and si-RNA targeting human IKK $\epsilon$  (si-IKK $\epsilon$ ) for 48 h. (A) siRNA transfected cells were treated with mtDNA (3  $\mu$ g/ml) for 6 h. The expression of proteins was analyzed by immunoblotting, quantified and normalized against actin. Values are mean  $\pm$  SD. Data were obtained from three independent experiments. (B) siRNA transfected cells were subsequently transfected with mtDNA (0, 3  $\mu$ g/ml; 20h), and followed by treatment of medium containing FBS (10%, 1h). The nuclear translocation of YAP1/TAZ complex were analyzed by immunofluorescence staining. Values are shown as mean  $\pm$  SD; data were obtained from three independent experiments,  $n = 9-15$ , two-tailed  $t$ -test. \*  $P < 0.05$ , \*\*  $P < 0.01$ , \*\*\*  $P < 0.001$ .
